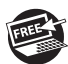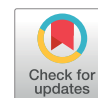

RESPONSE TO COMMENT ON EDELMAN AND POLONSKY

## Type 2 Diabetes in the Real World: The Elusive Nature of Glycemic Control.

Diabetes Care 2017;40:1425–1432

Diabetes Care 2018;41:e18 | <https://doi.org/10.2337/dci17-0050>Steven V. Edelman<sup>1,2</sup> and  
William H. Polonsky<sup>3,4</sup>

We thank Giugliano et al. (1) for their comments on our article (2) bringing to light two important issues. First, while we highlighted the importance of problematic medication adherence in diabetes care in our article and briefly examined several of the key contributors, we did not explore the physician's influence on the development of problematic adherence. We agree that physicians' confusion and/or lack of enthusiasm regarding the selection and use of diabetes medications and the manner in which such recommendations

are communicated to patients and subsequently reinforced over time may be critical in determining patients' interest and willingness in continuing to follow such recommendations. Second, by encouraging us to consider the physician's role, we are reminded to reemphasize that the observation of problematic adherence to prescribed medications must never be used as an excuse to blame patients for a "lack of motivation" or "being in denial." We believe that our patients, like all of us, are doing their best to respond rationally given the

pressures they face and the information and guidance they receive.

**Duality of Interest.** No potential conflicts of interest relevant to this article were reported.

### References

1. Giugliano D, Maiorino MI, Bellastella G, Esposito K. Comment on Edelman and Polonsky. Type 2 diabetes in the real world: the elusive nature of glycemic control. Diabetes Care 2017;40:1425–1432 (Letter). Diabetes Care 2018;41:e17. <https://doi.org/10.2337/dci17-1826>
2. Edelman SV, Polonsky WH. Type 2 diabetes in the real world: the elusive nature of glycemic control. Diabetes Care 2017;40:1425–1432

<sup>1</sup>Division of Endocrinology and Metabolism, School of Medicine, University of California, San Diego, San Diego, CA

<sup>2</sup>Veterans Affairs Medical Center, San Diego, CA

<sup>3</sup>Department of Psychiatry, University of California, San Diego, San Diego, CA

<sup>4</sup>Behavioral Diabetes Institute, San Diego, CA

Corresponding author: Steven V. Edelman, [svedelman@vapop.ucsd.edu](mailto:svedelman@vapop.ucsd.edu).

© 2018 by the American Diabetes Association. Readers may use this article as long as the work is properly cited, the use is educational and not for profit, and the work is not altered. More information is available at <http://www.diabetesjournals.org/content/license>.
